# Supplementary material
Source: HighWire-hosted journal article supplement (https://bmjopen.bmj.com/content/14/12/e090517)
Supplement: inline-supplementary-material-1 [file inline-supplementary-material-1.pdf]

Supplemental Figure 1. Receiver Operating Characteristic curves for trauma scores predicting early death or need for trauma intervention

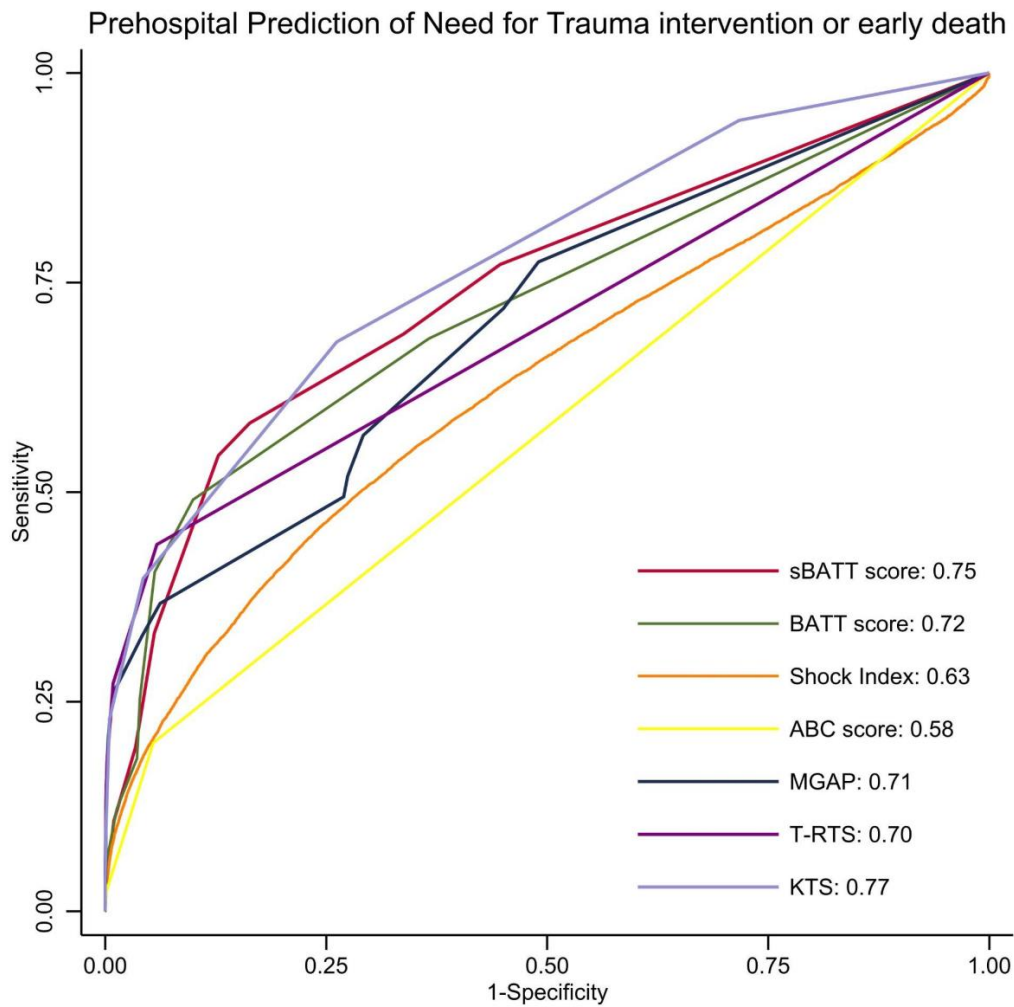

Supplemental Table 1. Discrimination of the different trauma scores by sex

|                    | Women            |             | Men              |             |
|--------------------|------------------|-------------|------------------|-------------|
|                    | N=18,175         |             | N=51,852         |             |
|                    | AUROC (95% CI)   | Negative LR | AUROC (95% CI)   | Negative LR |
| sBATT score (≥3)   | 0.89 (0.88-0.90) | 0.09        | 0.90 (0.90-0.91) | 0.05        |
| BATT score (≥3)    | 0.90 (0.90-0.91) | 0.04        | 0.91 (0.91-0.92) | 0.03        |
| Shock Index (≥0.9) | 0.62 (0.59-0.65) | 0.74        | 0.61 (0.59-0.63) | 0.75        |
| ABC score (≥2)     | 0.64 (0.62-0.66) | 0.96        | 0.67 (0.65-0.68) | 0.96        |
| MGAP (< 23)        | 0.95 (0.94-0.95) | 0.11        | 0.95 (0.94-0.95) | 0.11        |
| T-RTS (≤ 11)       | 0.91 (0.90-0.93) | 0.13        | 0.93 (0.92-0.94) | 0.11        |
| KTS (≤ 13)         | 0.94 (0.93-0.95) | 0.03        | 0.95 (0.94-0.95) | 0.04        |

Supplemental Table 2. Discrimination of the sBATT score to predict primary and secondary outcomes.

|                           | Early death      | NFTI-Death       | NFTI             |
|---------------------------|------------------|------------------|------------------|
| sBATT (85 mmHg)           |                  |                  |                  |
| AUROC                     | 0.90 (0.90-0.91) | 0.75 (0.74-0.75) | 0.73 (0.73-0.74) |
| Sensitivity               | 96%              | 59%              | 58%              |
| Specificity               | 72%              | 84%              | 83%              |
| Negative likelihood ratio | 0.06             | 0.49             | 0.51             |
| sBATT (60 mmHg)           |                  |                  |                  |
| AUROC                     | 0.90 (0.89-0.90) | 0.74 (0.74-0.75) | 0.73 (0.72-0.73) |
| Sensitivity               | 95%              | 57%              | 56%              |
| Specificity               | 73%              | 84%              | 83%              |
| Negative likelihood ratio | 0.07             | 0.51             | 0.53             |
